## Forelimb kinematics during hopping and landing in toads (*Bufo marinus*)

S. Cox<sup>1</sup>, G. Gillis<sup>1,2</sup>

<sup>1</sup>Graduate Program in Organismic and Evolutionary Biology, University of Massachusetts, Amherst MA 01003

<sup>2</sup>Department of Biology, Mount Holyoke College, South Hadley MA 01075

Corresponding author ([ggillis@mtholyoke.edu](mailto:ggillis@mtholyoke.edu)).

### Abstract

Coordinated landing in a variety of animals involves the re-positioning of limbs prior to impact to safely decelerate the body. However, limb kinematics strategies for landing vary considerably among species. For example, human legs are increasingly flexed before impact as drop height increases while in turkeys, legs are increasingly extended before impact with increasing drop height. In anurans, landing typically involves the use of forelimbs to decelerate the body after impact. Few detailed, quantitative descriptions of anuran forelimb kinematics during jumping exist and it isn't known if they prepare for larger landing forces by changing forelimb kinematics. In this study, we used high-speed video of 51 hops from five cane toads (*Bufo marinus*) to test the hypothesis that forelimb kinematics change predictably with distance. We measured excursions of the elbow (flexion/extension) and humerus (protraction/retraction and elevation/depression) throughout every hop. Results indicate that elbow and humeral excursions leading up to impact increase significantly with hop length, but do so without any change in the rate of movement. Instead, because the animal is in the air longer during longer hops, near-constant velocity movements lead to the larger excursions. These larger excursions in elbow extension result in animals hitting the ground with more extended forelimbs in longer hops, which in turn allows animals to decelerate over a greater distance.

**Keywords:** anurans, jumping, landing, control

## Introduction

Landing is an inevitable consequence of jumping. Coordinated landing requires energy dissipation over relatively long time periods, and in many vertebrate jumpers, limbs are used to extend the distance and time over which animals decelerate and dissipate energy after impact. A survey of kinematic strategies for landing suggests that limbs may be used in quite different ways across taxa to prepare for the moment of impact. For example, humans increasingly flex their legs as drop height increases, leading to a more flexed limb at impact during high drops (Ford et al., 2011; Hsu and Huang, 2002; Peng et al., 2011; Santello et al., 2001). In contrast, turkeys (Konow and Roberts, 2015) increasingly extend their legs with drop height leading to more extended limbs at impact during larger drops. Additional studies of cats (McKinley and Smith, 1983) and monkeys (Dyhre-Poulsen and Laursen, 1984), didn't emphasize effects of jump or drop distance on impact preparation kinematics, although both studies suggest that landing limbs are nearly fully extended at the point of impact.

In anurans, the clade of vertebrates perhaps best known for using jumping as a primary means of locomotion, descriptions of limb kinematics in preparation for impact have remained largely qualitative. Several studies have shown that various anuran species prepare for high landing forces by moving their forelimbs anteriorly during the aerial phase of a jump to help brace for impact (Gillis et al., 2010; Griep et al., 2013; Nauwelaerts and Aerts, 2006; Peters et al., 1996). The degree to which forelimbs are then able to decelerate the body varies markedly among species.

Cane toads, *Bufo marinus*, have recently received considerable attention as a model for studying the control of landing (Gillis et al., 2010; Akella and Gillis, 2011; Azizi and Abbott, 2013) because unlike more basal anurans, which often crash-land head or trunk first (Essner et al., 2010), cane toads routinely perform controlled, coordinated landings. To enable coordinated landing, they position their body and limbs appropriately in mid-air so as to align the ground reaction force vector close to the center of mass (Azizi et al., 2014), allowing them to balance on their forelimbs momentarily as they lower their hind limbs to the ground (Akella and Gillis, 2011; Gillis et al., 2010; Griep et al., 2013). Such control prepares animals well for the next hop, and may enable their migratory capability by allowing them to effectively string together many short hops to cover large distances (Estoup et al., 2010; Phillips et al., 2007). A recent review focusing on landing behavior in cane toads suggests that landing preparation may be complex (Gillis et al., 2014). Like in humans, monkeys and cats (Magalhães and Goroso, 2009; McKinley and Smith, 1983; Santello and McDonagh,

1998), cane toads increase the intensity of pre-landing recruitment in antagonistic forelimb muscles in longer hops (Gillis et al., 2010), in preparation for greater impact forces (Nauwelaerts & Aerts, 2006).

Given this distance-dependent pattern of pre-landing forelimb muscle recruitment in toads, associated forelimb movements might also change with hop length. Yet, previous examinations of anuran forelimb kinematics have not addressed this question, instead emphasizing important features of the landing event itself (Griep et al., 2013; Nauwelaerts and Aerts, 2006), the role of pectoral girdle anatomy (Emerson, 1983; Griep et al., 2013) or highlighting more general kinematics of the hop cycle (Peters et al., 1996). Recent work by Azizi and Abbot (2013), suggests that elbow excursions change with hop distance in *B. marinus*. During toad hopping, shortening and lengthening strains in the *m. anconeus*, a monoarticular elbow extensor, increase with hop length as the elbows extend before impact and flex after impact, respectively. Azizi and Abbot (2013) argue that these changes in fascicle strain before and after impact likely parallel one another and are important for preventing injuries associated with overstretching muscles involved in dissipating energy during landing (Azizi and Abbott, 2013). While one can infer distance-dependent elbow excursions based on these patterns of fascicle length change, such excursions have not been measured directly. A full kinematic description and analysis of forelimb movements during jumping in toads will improve our understanding of whether they alter limb kinematics in a way that helps to prevent muscular damage during landing.

If toads modulate forelimb kinematics with distance, this analysis could also help us answer how such modulation is achieved, giving us further insights into the control strategies involved. If forelimbs are extended more in longer hops, as is suggested by the Azizi and Abbot (2013) strain data, this can either be the result of changing the rate of limb joint extension before impact and/or changing the duration over which these movements occur. These possibilities suggest distinct motor strategies that vary in complexity to achieve the same result at impact.

In this study, we examine the 3D kinematics of the elbow joint and humerus in hopping cane toads to test whether elbow and humeral kinematics vary with hop distance. In particular, we measured the elbow angle and humeral configurations throughout each hop and determined the angular excursions and durations of each phase of the hop. We hypothesize that, 1) in line with muscle fascicle strain data from toads (Azizi and Abbott, 2013), forelimbs will be more extended at impact in longer hops, and 2) increased elbow extension excursions before impact will parallel increased elbow flexion excursions after impact. For any forelimb

excursions that change with hop distance, we determine if such changes are a result of alterations in velocity and/or simply the duration available for movement. Since EMG data suggest that elbow extensor muscles are activated later and with greater pre-landing intensity in longer hops (Gillis et al., 2010), we hypothesize that elbows begin extending later and with a greater velocity in longer hops.

## Materials and methods

### *Animals*

Five adult *Bufo marinus* (61-124 g) were obtained from a commercial supplier and housed in groups of 2 to 4 in large plastic containers in a holding room maintained at ~ 24°C with a 12 hr light: dark cycle. They were fed a diet of crickets several times a week and water was always available.

### *Jumping Trials*

Toads' limbs were marked at the elbow, wrist and midway along the humerus to characterize elbow angle, and three marking a T along the longitudinal axis of the back were additionally used to quantify humeral movements in a vertical plane (elevation/depression) and horizontal plane (protraction/retraction) (Fig. 1). Following marker placement, animals were placed in a rectangular glass tank (89 cm X 43 cm X 43 cm) lined on the bottom with rough felt to ensure purchase. The tank was lit from the sides and above with two 600 W bulbs. Two high-speed cameras (Fastec HiSpec, San Diego, CA) were positioned above the animal and perpendicular to each other to record simultaneous video for 3D kinematic reconstruction. Toads were placed at the end of the tank and encouraged to hop with a touch or sound. Hops were recorded at 500 fps (1280 x 1024 pixels) and videos were calibrated with a 64-point 3D calibration cube.

### *Data Analysis*

All video sequences were analyzed to identify the onset and end of animal movement for each hop. The six marked points were then digitized in each frame between these time points and 3D coordinates calculated with Matlab software (Hedrick, 2008). Data were smoothed with a quintic spline interpolation and elbow flexion/extension angle,  $\alpha$ , humeral

protraction/retraction angle,  $\beta$ , and humeral elevation/depression angle,  $\delta$ , were calculated as in Figure 1. Hop distance was calculated as the horizontal distance between the starting and ending positions of a point on the back (Fig. 1). For each video frame in every hop,  $\alpha$ ,  $\beta$ , and  $\delta$  were found. Preliminary analyses of data revealed four consistent phases in each hop (described in Results), and the values of  $\alpha$ ,  $\beta$ , and  $\delta$  were identified at the start and end of each phase and used to calculate angular excursions and velocities for each phase. In addition, the duration of each phase in every hop was calculated.

### *Statistics*

Each of the variables,  $\alpha$ ,  $\beta$ , and  $\delta$  at the start and end of each phase, as well as the associated excursions, velocities and durations were fit with two mixed linear models; a null model with no fixed effect and a full model with hop distance as a fixed effect (Bates et al., 2014). In both models, individual toads were included as random effects. The p-value for each full model was computed with a Likelihood Ratio Test between the full and reduced model and corrected for multiple comparisons with a Bonferroni Correction factor for the number of tests performed.

## **Results**

### *Kinematics*

A total of 51 hops from 5 animals (9-11 hops each) were used in this study. Hop distances ranged between 14 and 39 cm (mean =  $25 \pm 5$  cm). All other descriptive statistics are presented as mean  $\pm$  s.d. of individual means in Tables 1 and 2 as well as in the text. Excursions of elbow extension, humeral protraction and humeral elevation will be designated by positive values; elbow flexion, humeral retraction and humeral depression will be designated by negative values.

### *Phases of the Hop*

All hops could be broken down into four phases using inflection points of the elbow angle,  $\alpha$  (Figs 1, 2). The first phase, hop initiation, begins with the onset of animal movement (defined by when the velocity of the toad increases beyond 5 cm/s) and ends when the elbow begins to flex ( $\alpha_1$  at  $T_1$  in Fig. 2c). The second phase, forelimb liftoff, lasts until the elbow

stops flexing ( $\alpha_2$  at  $T_2$  in Fig. 2c). The third phase, impact preparation, involves extension of the elbow and lasts until impact, at which point the elbow begins to flex again, signaling the final, landing phase ( $\alpha_3$  at  $T_3$  in Fig. 2c). The landing phase ends when the elbow stops flexing after impact ( $\alpha_4$  at  $T_4$  Fig. 2c). Despite these stereotypical phases, there was considerable variation in the forelimb kinematics measured both within and between individuals (Fig. 3).

### *Hop Initiation*

Animals begin hops in a resting position with their elbows at close to a right angle ( $\alpha_0 = 79 \pm 14^\circ$ ) and humeri pointed posteriolaterally ( $\beta_0 = 49 \pm 17^\circ$ ), and slightly toward the ground ( $\delta_0 = 172 \pm 11^\circ$ ) (refer to Fig. 1 for definitions of  $\alpha$ ,  $\beta$ ,  $\delta$ ;  $\alpha_0$ ,  $\beta_0$ ,  $\delta_0$  represent angular values at time 0 (e.g. Fig.2)). Hop initiation begins as the hind limbs start to extend and the animal is pushed up and forward (Fig. 2a). During this phase there is little forelimb movement (Fig. 2), although in several animals some elbow extension ( $\alpha_1 - \alpha_0 = 10-20^\circ$ ) was observed, especially when they began with their elbows in a particularly flexed configuration. The average duration of the hop initiation phase ( $T_1 - T_0$ ) is  $78 \pm 30$  ms.

### *Forelimb Liftoff*

As the hind limbs continue to extend and the toad elevates, the forelimb liftoff phase begins, and is characterized by substantial elbow flexion ( $\alpha_2 - \alpha_1: -29 \pm 11^\circ$ ) and humeral protraction ( $\beta_2 - \beta_1: 27 \pm 11^\circ$ ) (Fig. 2). There is typically little-to-no humeral elevation or depression in this phase ( $\delta_2 - \delta_1: -1 \pm 11^\circ$ ). The combined actions of hindlimb extension and elbow flexion lead to the forelimb losing ground contact, and humeral protraction begins to reposition the manus more anteriorly. The relative timing of this phase is highly variable in relation to hind limb actions. For example, in some hops this entire phase occurs before hind limb liftoff (i.e., before the animal takes off), while in others it ends much later in the aerial phase. The average duration of the forelimb liftoff phase ( $T_2 - T_1$ ) is  $75 \pm 16$  ms.

### *Impact Preparation*

The impact preparation phase starts when the elbows stop flexing and begin to extend, and involves large amounts of elbow extension ( $\alpha_3 - \alpha_2: 47 \pm 13^\circ$ ), humeral protraction ( $\beta_3 - \beta_2: 45 \pm 15^\circ$ ) and humeral depression ( $\delta_3 - \delta_2: -37 \pm 10^\circ$ ) (Fig. 2). All of these movements serve to position the manus more anteriorly and ventrally (toward the ground) as

the animal braces for landing. The average duration of this phase ( $T_3-T_2$ ) is  $91 \pm 25$  ms and the onset of impact preparation from the beginning of movement ( $T_2-T_0$ ) is  $152 \pm 26$  ms.

### *Landing*

At touchdown the arms are typically configured so that the elbows are extended ( $\alpha_3 = 108 \pm 14^\circ$ ) and the humeri protracted ( $\beta_3 = 109 \pm 12^\circ$ ) and depressed ( $\delta_3 = 137 \pm 11^\circ$ ) well beyond their positions at any other point in the hop (Fig. 2). Increased extension excursions at the elbow ( $\alpha_3-\alpha_2$ ) in preparation for impact in longer hops are mirrored by increased flexion excursions after impact ( $\alpha_4-\alpha_3$ ; fig. 4). During the landing phase, the elbows flex ( $\alpha_4-\alpha_3$ :  $-38 \pm 14^\circ$ ), and the humeri are driven posteriorly ( $\beta_4 - \beta_3$ :  $-55 \pm 14^\circ$ ) and dorsally ( $\delta_4 - \delta_3$ :  $29 \pm 10^\circ$ ) as the body decelerates over ( $T_4-T_3$ )  $57 \pm 10$  ms. Touchdown occurs  $243 \pm 24$  ms after onset of movement ( $T_3-T_0$ ).

### *Distance Dependence*

Forelimb kinematics are independent of distance in the first two hop phases: hop initiation and forelimb liftoff. But kinematics do vary significantly with distance during the impact preparation and landing phases. For example, while the onset of the impact preparation phase does not grow later with distance ( $p=0.47$ ; Table 3), the phase's duration increases with longer hops ( $p<0.001$ ; Table 3), as the animal remains in the air longer before impact. Yet, neither elbow extension nor humeral protraction velocities change significantly with hop distance during this phase, and as a result, this increased duration leads to significantly greater elbow excursions ( $\alpha_3-\alpha_2$ ; Fig. 5a) and humeral protractions ( $\beta_3 - \beta_2$ ; Fig. 5b) during longer hops ( $p<0.001$  for both cases; Table 3), and to a more extended ( $\alpha_3$ , Fig. 5c) and protracted ( $\beta_3$ , Fig. 5d) forelimb configuration at impact ( $p<0.001$  for both cases) (Table 3). Humeral depression excursions during impact preparation ( $\delta_3 - \delta_2$ ) also increase significantly with hop length ( $p<0.001$ ); however, these increased excursions do not result in significantly different humeral depressions at impact ( $\delta_4 - \delta_3$ ) after Bonferroni correction (Table 3).

During the landing phase, both elbow and humeral kinematics vary with hop distance. The amount and velocity of elbow flexion ( $\alpha_4-\alpha_3$ ), humeral retraction ( $\beta_4 - \beta_3$ ), and elevation ( $\delta_4 - \delta_3$ ) increase significantly with distance, as does the phase's duration ( $T_4-T_3$ :  $p<0.001$  for all cases; Table 3). Humeral elevation velocities are distance-dependent during landing (Table 3). In addition, the elbow and humeral configuration at the end of the landing

phase,  $(\alpha_4, \beta_4, \delta_4)$ , when elbows are most flexed, are independent of hop length (Table 3). Thus, during landings from longer hops, the elbows start more extended and humeri more protracted at impact but flex and retract more and faster over a longer time to end at similar configurations to short hops (Fig. 4 Table 3).

## Discussion

Our study was motivated by the question of how toads use their forelimbs to coordinate landing hops across a range of distances. Specifically, we asked whether toad forelimbs move differently before and after landing depending on hop distance and, if so, how these different kinematic patterns are achieved. In line with our first hypothesis, we found that toad forelimbs are significantly more extended and protracted at impact in longer hops (Table 3). These more exaggerated positions are the result of greater excursions of the elbow and humerus during the impact preparation phase (Table 3; Fig. 5). In support of our second hypothesis, these distance-dependent preparatory excursions are mirrored by similarly distant-dependent amounts of elbow flexion and humeral retraction after impact (Fig. 4). However, excursions during impact preparation were not accomplished as we expected. We hypothesized that elbows would begin to extend later in longer hops and move with a greater velocity. Rather, we found that elbow extension did not begin later in longer hops (Table 3), and extension velocities during impact preparation were independent of distance. Greater elbow excursions (and humeral protractions) were, instead, a result of greater durations available to move during longer hops (Table 3).



## *Toad forelimb kinematics and control*

Cane toads land in a coordinated manner and under most conditions neither the trunk nor head contacts the substrate during landing. Instead, deceleration is exclusively controlled by the forelimbs and their underlying musculature (Azizi and Abbott, 2013; Gillis et al., 2014). Such coordination relies on appropriate pre-landing muscle activity patterns in the forelimbs (Gillis et al., 2010). However, modulating the activation timing and intensity of forelimb muscles prior to impact appears to be only one part of an integrated strategy to manage the variety of impact forces and energies associated with landing in hops of different distance. Our results indicate that cane toads also extend their elbows further during longer hops (Fig. 5a), providing a greater braking distance over which forelimb muscles can be used to decelerate the body after impact. Indeed, this is consistent with our results supporting our second hypothesis and showing that increases in preparatory elbow extension in longer hops are mirrored by subsequent increases in elbow flexion after impact (Fig. 4). As a result, the most flexed configuration of the elbow during landing doesn't vary with distance. Ensuring that forelimbs are more extended at impact in longer hops expands the range of impact velocities that can be managed without over-stretching muscles involved in dissipating landing energy and decelerating the body (Azizi and Abbott, 2013).

Toads modulate elbow configuration before impact using a kinematic strategy that does not change with hop distance. Toads begin to extend their elbows at roughly the same time in all hops and continue extending them at approximately the same velocity until they land. This kinematic pattern could be explained by a simple clock-like control strategy that produces forelimb landing configurations that vary predictably with distance without the need for sensory feedback. Starting elbow extension at roughly the same time in all hops allows more time for elbow extension before impact during longer hops simply because animals are in the air for greater durations. During shorter hops where the landing forces are smaller, a less-extended elbow configuration is observed at impact when smaller braking distances suffice. This type of simple control strategy can even accommodate hops over terrain of variable heights. For example, animals will hit the ground later and with more force when jumping to lower landing sites, but will hit the ground with a more extended forelimb since they are in the air longer. Likewise, animals hopping up an incline will hit the ground sooner and with less force than on the level, but also with less extended forelimbs. The pattern of forelimb kinematics we observed in preparation for landing in toads is consistent with a

simple control strategy that can produce functional variations in forelimb landing configurations for a range of impact velocities without the need for sensory feedback.

The strength of this strategy is also the source of its limitations, namely that it is governed by one simple rule: animals begin to extend elbows in preparation for impact at roughly the same time and at the same rate in every hop. However, this rule implies that forelimb movements will be bilaterally symmetrical—i.e. both arms extend simultaneously. Such kinematic symmetry does not easily accommodate landings in which the toad rolls in the air or otherwise lands with one arm well before the other. Thus, a simple clock-like landing control strategy might manage landing variations related to changes in distance or height well, but may not be sufficient to accommodate asymmetrical impacts.

A more complex strategy involving the independent control of forelimbs would avoid this limitation. Moving the two forelimbs differently in anticipation of an asymmetric landing would allow for better locomotor control under more variable conditions. Yet this level of control would require both sensory feedback to anticipate differential impact conditions of each limb and the ability to vary the timing (and/or velocity) of individual elbow excursions to brace for uneven landings. Thus, improvements in control come at a cost of more complex sensorimotor integration.

We had, in fact, hypothesized that forelimbs would be controlled by a more complex strategy involving variation in the timing and velocity of forelimb kinematics because previous results for the elbow extensor, *m. anconeus*, indicated distance-dependent activation timing and intensity (Gillis et al., 2010). Yet, our results do not support this hypothesis. This apparent decoupling between EMG activity in an elbow extensor (*m. anconeus*) and the rate and timing of elbow extension may reflect the simultaneous actions of the *m. coracoradialis*, an antagonistic elbow flexor, which is also active throughout the impact preparation phase (Gillis et al., 2010). If this is the case, then the simple pattern of forelimb kinematics we've observed may be the result of a complex sensorimotor control strategy that also must account for antagonistic contractions important for joint stabilization at impact. Further studies that measure both kinematics and muscle activity simultaneously in non-level hops may be able to shed more light on the control strategy toads use to perform such controlled landings.

#### *Comparative limb kinematics in preparation for landing*

While patterns of pre-landing limb muscle activity have received a great deal of attention across a range of vertebrate jumpers (Akella and Gillis, 2011; Dyhre-Poulsen and

Laursen, 1984; Magalhães and Goroso, 2009; McKinley et al., 1983; Santello, 2005; Santello and McDonagh, 1998), less is known about details of the corresponding limb kinematics. Yet, we can infer some information about pre-landing limb kinematics from data on limb configurations in anticipation of impact. There appear to be at least two different strategies for preparing limbs for the moment of impact. In humans, as the expected force of impact increases, limbs are moved into more flexed configurations before landing (Ford et al., 2011; Hsu and Huang, 2002; Peng et al., 2011; Santello et al., 2001). Studies on the effects of knee flexion at impact show that more extended limb configurations increase maximum ground reaction force and skeletal stress while decreasing the energy absorbed by the musculature (Devita and Skelly, 1992; Louw and Grimmer, 2006; Podraza and White, 2010). In toads and turkeys, the opposite strategy is used; the landing limb is increasingly extended as the expected force of impact rises. Nevertheless, despite this increasing extension, toad and turkey limbs are far from straight at the point of impact [e.g., elbow angles in toads and knee angles in turkeys typically reach  $\sim 140^\circ$  in the longest hops and highest drops (Konow and Roberts, 2015)], similar to knee configurations observed landing humans ( $150^\circ - 165^\circ$ : Devita & Skelly, 1992; Hsu & Huang, 2002; Janssen *et al.*, 2012). Thus, although movement patterns of limbs during impact preparation differ between species, what remains consistent is that limbs are not held fully straight at the point of impact, reducing the likelihood of hyperextension and decreasing skeletal stress while allowing muscles to dissipate much of the energy.

## Acknowledgements

Thanks to Laura Ekstrom, Eleanor Maynard, Flynn Vickowski, Kate Pelletier and Amee Phan for their help with a preliminary pilot of this study. This work was supported by NSF grant 1051603 to G.G. All work was approved by Mount Holyoke College's IACUC.

## References

- Akella, T. and Gillis, G. B.** (2011). Hopping isn't always about the legs: forelimb muscle activity patterns during toad locomotion. *J. Exp. Zool. A. Ecol. Genet. Physiol.* **315**, 1–11.
- Azizi, E.** (2014). Locomotor function shapes the passive mechanical properties and operating lengths of muscle. *Proc. Biol. Sci.* **281**, 20132914.
- Azizi, E. and Abbott, E. M.** (2013). Anticipatory motor patterns limit muscle stretch during landing in toads. *Biol. Lett.* **9**, 20121045.
- Azizi, E., Larson, N. P., Abbott, E. M. and Danos, N.** (2014). Reduce torques and stick the landing: limb posture during landing in toads. *J. Exp. Biol.* **217**, 3742–3747.
- Bates, D., Maechler, M., Bolker, B. and Walker, S.** (2014). lme4: Linear mixed-effects models using Eigen and S4. R package version 1.1–7.
- Devita, P. and Skelly, W. a.** (1992). Effect of landing stiffness on joint kinetics and energetics in the lower extremity. *Med. Sci. Sport. Exerc.* **24**, 108–115.
- Dyhre-Poulsen, P. and Laursen, A.** (1984). Programmed electromyographic activity and negative incremental muscle stiffness in monkeys jumping downward. *J. Physiol.* **350**, 121–136.
- Emerson, S.** (1983). Functional-analysis of frog pectoral girdles - the epicoracoid cartilages. *J. Zool.* **201**, 293–308.
- Essner, R. L., Suffian, D. J., Bishop, P. J. and Reilly, S. M.** (2010). Landing in basal frogs: evidence of saltational patterns in the evolution of anuran locomotion. *Naturwissenschaften* **97**, 935–9.
- Estoup, A., Baird, S. J. E., Ray, N., Currat, M., Cornuet, J. M., Santos, F., Beaumont, M. a. and Excoffier, L.** (2010). Combining genetic, historical and geographical data to reconstruct the dynamics of bioinvasions: application to the cane toad *Bufo marinus*. *Mol. Ecol. Resour.* **10**, 886–901.
- Ford, K. R., Myer, G. D., Schmitt, L. C., Uhl, T. L. and Hewett, T. E.** (2011). Preferential quadriceps activation in female athletes with incremental increases in landing intensity. *J. Appl. Biomech.* **27**, 215–222.
- Gillis, G. B., Akella, T. and Gunaratne, R.** (2010). Do toads have a jump on how far they hop? Pre-landing activity timing and intensity in forelimb muscles of hopping *Bufo marinus*. *Biol. Lett.* **6**, 486–9.
- Gillis, G., Ekstrom, L. and Azizi, E.** (2014). Biomechanics and Control of Landing in Toads. *Integr. Comp. Biol.* **54**, 1136–1147.

- Griep, S., Schilling, N., Marshall, P., Amling, M., Hahne, L. M. and Haas, A.** (2013). Pectoral girdle movements and the role of the glenohumeral joint during landing in the toad, *Rhinella marina* (Linnaeus, 1758). *Zoomorphology* **132**, 325–338.
- Hedrick, T. L.** (2008). Software techniques for two- and three-dimensional kinematic measurements of biological and biomimetic systems. *Bioinspir. Biomim.* **3**, 034001.
- Hsu, T. and Huang, C.** (2002). Influence of different heights on mechanics of children's landing. In *International Symposium on Biomechanics in Sports*, pp. 440–442. Caceres, Spain.
- Janssen, I., Sheppard, J. M., Dingley, A. A., Chapman, D. W. and Spratford, W.** (2012). Lower extremity kinematics and kinetics when landing from unloaded and loaded jumps. **28**, 687–693.
- Konow, N. and Roberts, T. J.** (2015). The series elastic shock absorber : tendon elasticity modulates energy dissipation by muscle during burst deceleration. *Proc. R. Soc. Biol. Sci.* **282**, 1–8.
- Louw, Q. and Grimmer, K.** (2006). Biomechanical factors associated with the risk of knee injury when landing from a jump. **18**, 18–23.
- Magalhães, F. and Goroso, D.** (2009). Preparatory EMG activity reveals a rapid adaptation pattern in humans performing landing movements in blindfolded condition. *Percept. Mot. Skills* **109**, 500–516.
- McKinley, P. and Smith, J.** (1983). Visual and vestibular contributions to prelanding EMG during jump-downs in cats. *Exp. Brain Res.* **52**, 439–48.
- McKinley, P., Smith, J. and Gregor, R.** (1983). Responses of elbow extensors to landing forces during jump downs in cats. *Exp. Brain Res.* **49**, 218–28.
- Nauwelaerts, S. and Aerts, P.** (2006). Take-off and landing forces in jumping frogs. *J. Exp. Biol.* **209**, 66–77.
- Peng, H. Te, Kernozek, T. W. and Song, C. Y.** (2011). Quadricep and hamstring activation during drop jumps with changes in drop height. *Phys. Ther. Sport* **12**, 127–132.
- Peters, S. E., Kamel, L. T. and Bashor, D. P.** (1996). Hopping and Swimming in the Leopard Frog,. *J. Morphol.* **230**, 1–16.
- Phillips, B. L., Brown, G. P., Greenlees, M., Webb, J. K. and Shine, R.** (2007). Rapid expansion of the cane toad (*Bufo marinus*) invasion front in tropical Australia. *Austral Ecol.* **32**, 169–176.
- Podraza, J. T. and White, S. C.** (2010). Effect of knee flexion angle on ground reaction forces, knee moments and muscle co-contraction during an impact-like deceleration landing: Implications for the non-contact mechanism of ACL injury. *Knee* **17**, 291–295.

- Santello, M.** (2005). Review of motor control mechanisms underlying impact absorption from falls. *Gait posture* **21**, 85–94.
- Santello, M. and McDonagh, M. J.** (1998). The control of timing and amplitude of EMG activity in landing movements in humans. *Exp. Physiol.* **83**, 857–74.
- Santello, M., McDonagh, M. J. and Challis, J. H.** (2001). Visual and non-visual control of landing movements in humans. *J. Physiol.* **537**, 313–27.

## Tables

**Table 1** Mean values of  $\alpha$ ,  $\beta$ , and  $\delta$  at the start and end of each phase

|                                                | T <sub>0</sub> | T <sub>1</sub> | T <sub>2</sub> | T <sub>3</sub> | T <sub>4</sub> |
|------------------------------------------------|----------------|----------------|----------------|----------------|----------------|
| <i>Elbow extension, <math>\alpha</math></i>    | 79±14°         | 90±12°         | 61±6°          | 108±14°        | 69±9°          |
| <i>Humeral protraction, <math>\beta</math></i> | 49±17°         | 37±12°         | 64±10°         | 109±12°        | 54±8°          |
| <i>Humeral depression, <math>\delta</math></i> | 172±11°        | 175±11°        | 174±8°         | 137±11°        | 166±12°        |

**Table 2** Mean excursions and velocities (°/ms) and durations for each hop phase.

|            | Hop Initiation                     |                 | Forelimb Liftoff                   |                 | Impact Preparation                 |                 | Landing                            |                 |
|------------|------------------------------------|-----------------|------------------------------------|-----------------|------------------------------------|-----------------|------------------------------------|-----------------|
| <i>Dur</i> | 78±30 ms                           |                 | 75±16 ms                           |                 | 92±25 ms                           |                 | 57±10 ms                           |                 |
| <i>x°</i>  | <i>x<sub>1</sub>-x<sub>0</sub></i> | <i>Velocity</i> | <i>x<sub>2</sub>-x<sub>1</sub></i> | <i>Velocity</i> | <i>x<sub>3</sub>-x<sub>2</sub></i> | <i>Velocity</i> | <i>x<sub>4</sub>-x<sub>3</sub></i> | <i>Velocity</i> |
| $\alpha$   | 10±10                              | 120±125         | -29±11                             | -378±127        | 47±13                              | 512±100         | -38±14                             | -678±201        |
| $\beta$    | -12±11                             | -144±119        | 27±11                              | 379±165         | 45±15                              | 495±122         | -55±14                             | -986±204        |
| $\delta$   | 3±8                                | 49±110          | -1±11                              | 5±165           | -37±10                             | -424±106        | 29±10                              | 539±139         |

**Table 3 P-values for models fit with each variable against hop distance in comparison to the null. Bolded values are significant with Bonferroni correction. All significant relationships are positive correlations. When impact velocity rather than distance was used as the fixed factor and all variables showed similar significance. Hop phase duration is the length of the phase (i.e. T2-T1). Onset is the duration from the onset of movement to the onset of a phase (i.e. T2-T0).**

| Configurations                    |                |                |                  |          |                    |          |                |               |
|-----------------------------------|----------------|----------------|------------------|----------|--------------------|----------|----------------|---------------|
|                                   | T <sub>0</sub> | T <sub>1</sub> | T <sub>2</sub>   |          | T <sub>3</sub>     |          | T <sub>4</sub> |               |
| $\alpha$                          | 0.49           | 0.69           | 0.23             |          | <b>1.7e-10</b>     |          | 0.71           |               |
| $\beta$                           | 0.90           | 0.42           | 0.24             |          | <b>3.7e-07</b>     |          | 0.052          |               |
| $\delta$                          | 0.66           | 0.81           | 0.86             |          | 5.7e-3             |          | 0.40           |               |
| Excursions and angular velocities |                |                |                  |          |                    |          |                |               |
|                                   | Hop Initiation |                | Forelimb Liftoff |          | Impact Preparation |          | Landing        |               |
| Duration                          | 0.36           |                | 0.14             |          | <b>1.5e-5</b>      |          | <b>2.9e-4</b>  |               |
| Onset                             | 1.0            |                | 0.36             |          | 0.47               |          | <b>3.8e-6</b>  |               |
| x                                 | $x_1-x_0$      | Velocity       | $x_2-x_1$        | Velocity | $x_3-x_2$          | Velocity | $x_4-x_3$      | Velocity      |
| $\alpha$                          | 0.023          | 0.14           | 0.41             | 0.30     | <b>2.6e-11</b>     | 2.5e-3   | <b>2.5e-10</b> | <b>1.7e-9</b> |
| $\beta$                           | 0.41           | 0.42           | 0.65             | 0.97     | <b>6.5e-7</b>      | 0.11     | <b>1.4e-9</b>  | <b>1.0e-6</b> |
| $\delta$                          | 0.47           | 0.65           | 0.88             | 0.40     | <b>1.6e-5</b>      | 0.98     | <b>5.6e-4</b>  | 0.022         |



## Figures

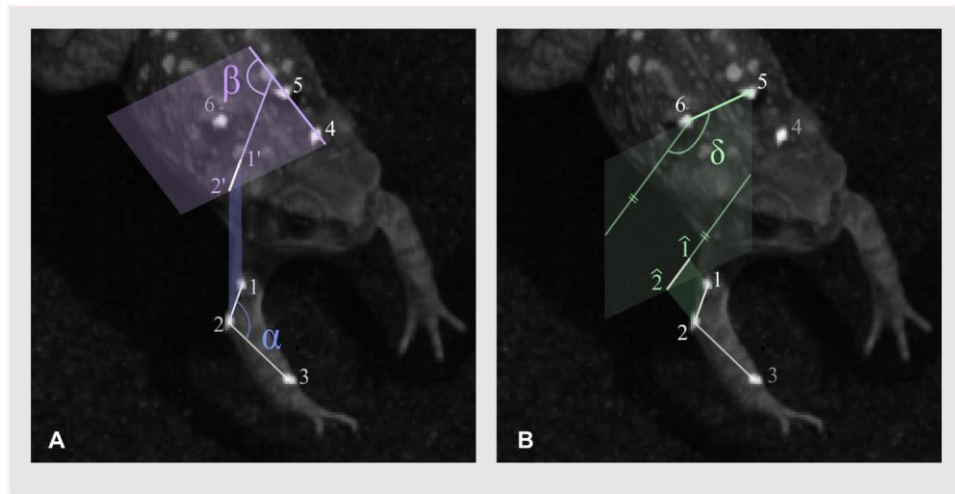

**Figure 1. Markers and their use in calculating elbow and humeral kinematics.** White points with white numbers designate marker positions on the toads. Line segments are referred to by their end point marker numbers such that the line segment between points one and two will be segment  $\overline{1\ 2}$  and a line through those points is  $\overleftrightarrow{1\ 2}$ . Elbow extension/flexion angle,  $\alpha$ , was defined as the angle between the segments  $\overline{1\ 2}$  and  $\overline{2\ 3}$  in 3D space (panel a). Humeral position was broken down into projections of the humeral segment  $\overline{1\ 2}$  onto the horizontal and vertical planes. Humeral protraction/retraction angle,  $\beta$ , was calculated by projecting the humeral segment,  $\overline{1\ 2}$ , onto the horizontal plane as  $\overline{1'\ 2'}$  (panel a). Protraction/retraction was calculated as the angle between the line  $\overleftrightarrow{1'\ 2'}$  and the central axis of the body, defined by the line  $\overleftrightarrow{4\ 5}$ . When the humerus was perpendicular to the central axis of the body, humeral protraction/retraction angle was  $90^\circ$ . Humeral elevation/depression angle,  $\delta$ , was calculated by projecting the segment  $\overline{1\ 2}$  onto the vertical plane (points  $\hat{1}\ \hat{2}$ , panel b). Elevation/depression was defined as the angle between the line  $\overleftrightarrow{5\ 6}$  and  $\overleftrightarrow{\hat{1}\ \hat{2}}$ . Humeral elevation/depression angle was  $180^\circ$  when the humerus was parallel to the plane of the back of the toad.

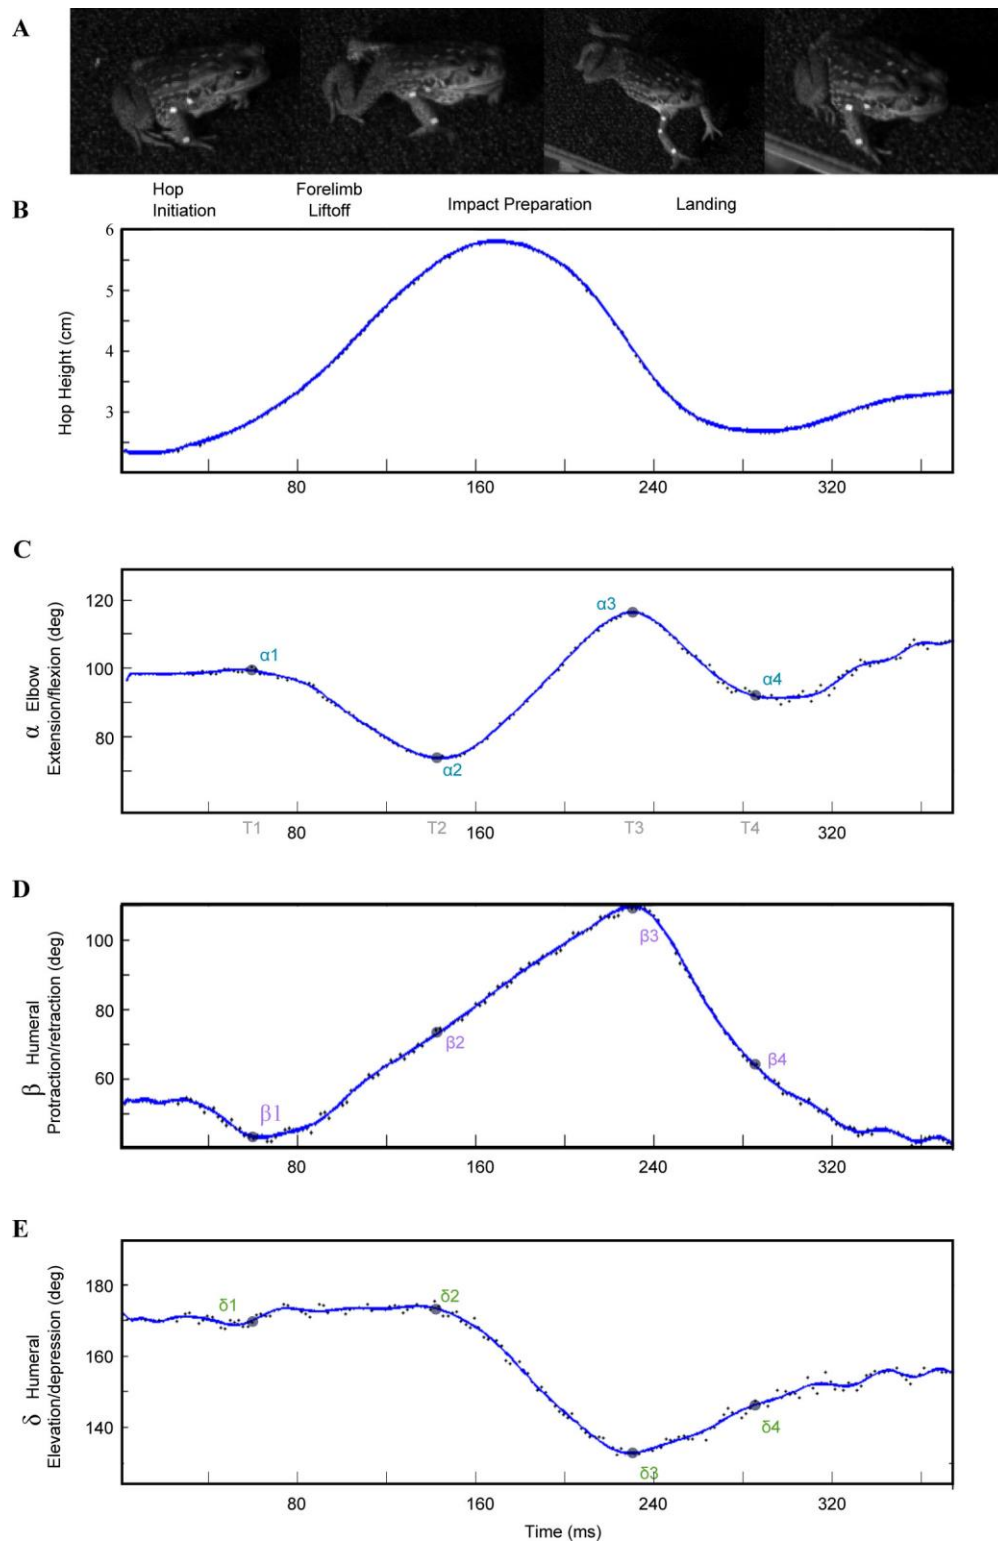

**Figure 2. Representative kinematics from a single hop, with the four hop phases labeled and mapped onto the panels. a) High-speed video images representing different points in the hop; b) Hop height; c) Elbow extension/flexion, with T<sub>1</sub>-T<sub>4</sub> labeled on the x-axis**

representing the points used to define the beginning and end of each phase,  $\alpha_1$ - $\alpha_4$  also highlighted as the corresponding angle at those times ; d) Humeral protraction/retraction, with  $\beta_1$ - $\beta_4$  highlighted; e) Humeral elevation/depression, with  $\delta_1$ - $\delta_4$  highlighted. Note, traces do not return to starting values because resting postures are highly variable.

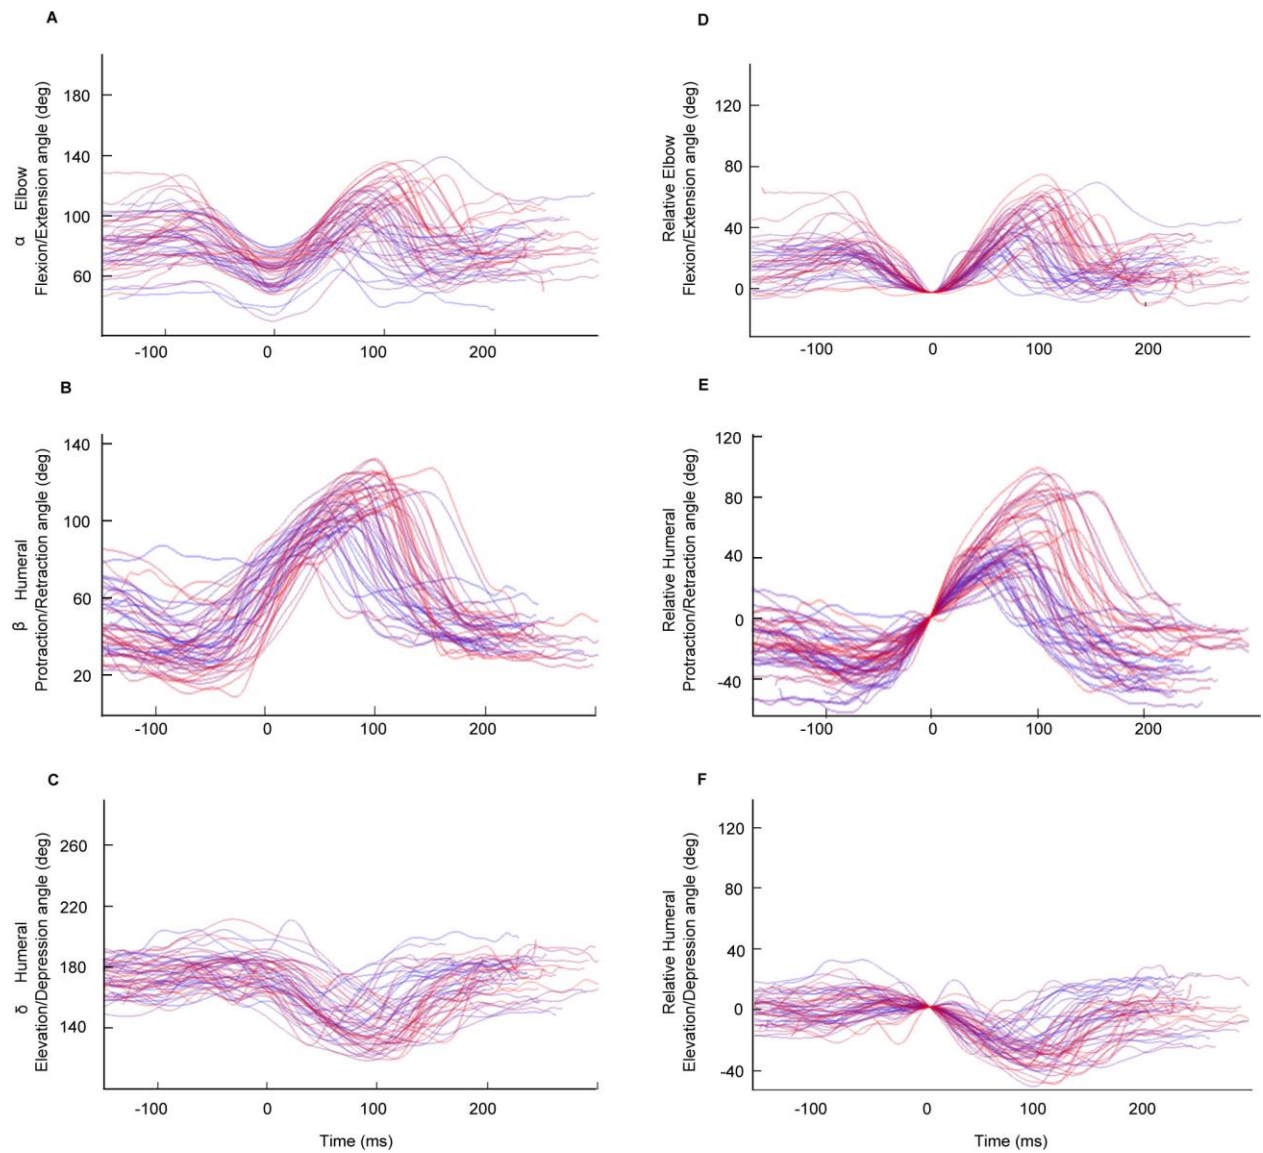

**Figure 3. Variation in forelimb kinematics.** Elbow and humeral angles for all hops for all individuals with time zeroed at  $T_2$  (a, b and c), and time and y-axis values zeroed at  $T_2$  (d, e, f). Colors indicate hop length with warmer colors indicating longer hops.

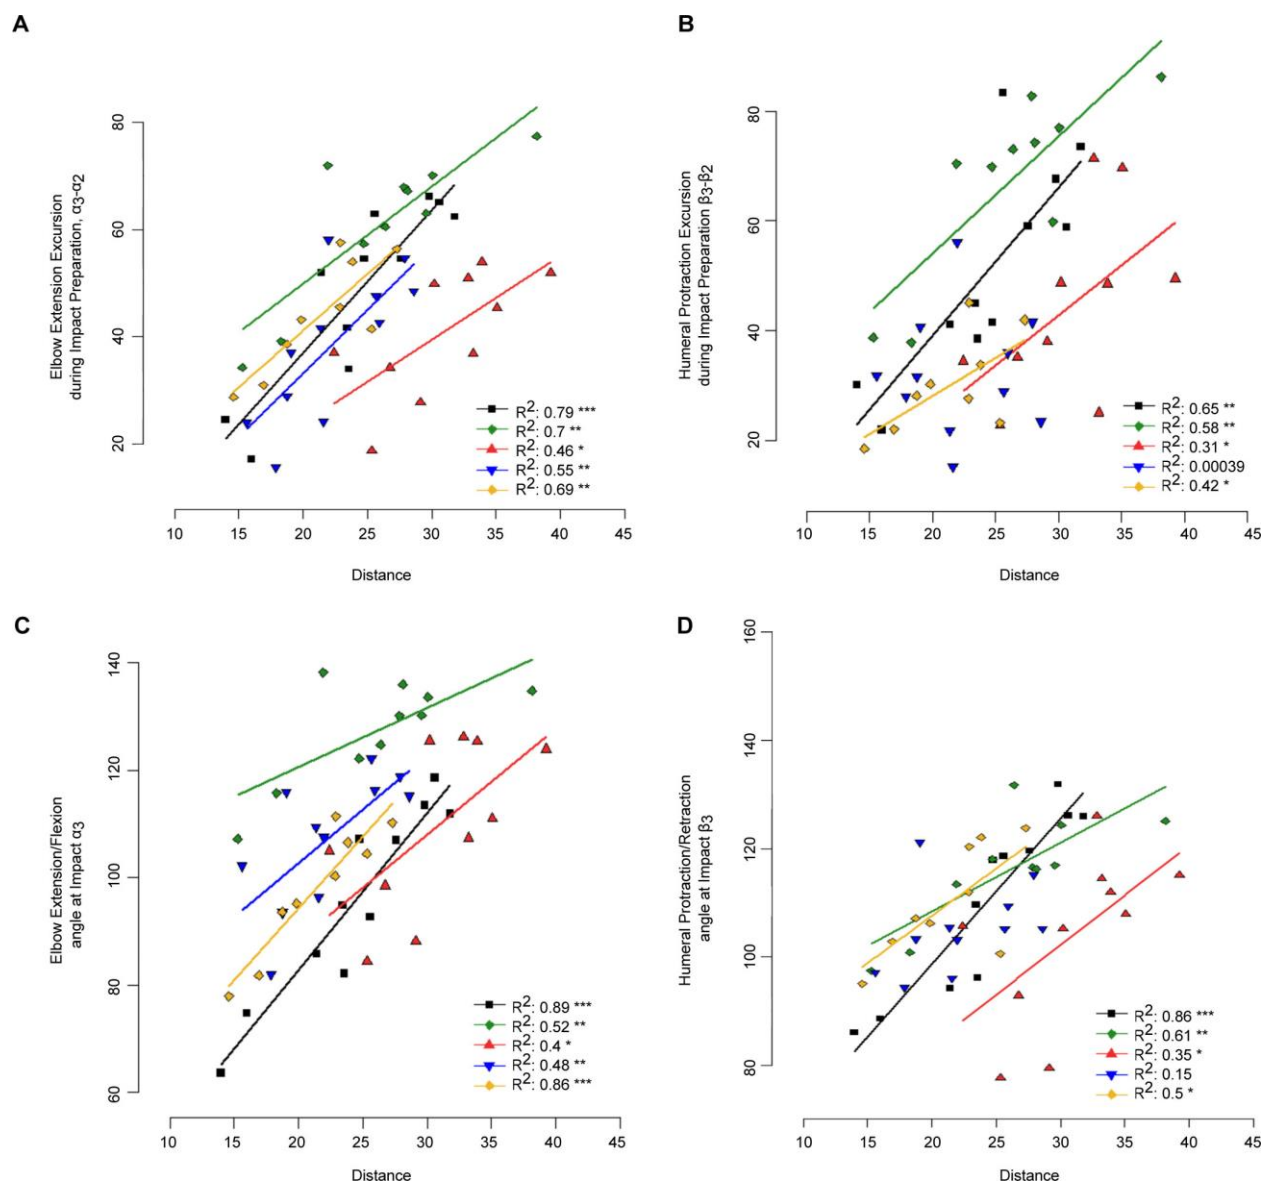

**Figure 4. Elbow extension excursions during impact preparation,  $\alpha_3-\alpha_2$ , versus elbow flexion excursions during landing,  $\alpha_4-\alpha_3$ .** Different symbols and colors represent different animals and regression lines reflect significant relationships for individual toads.

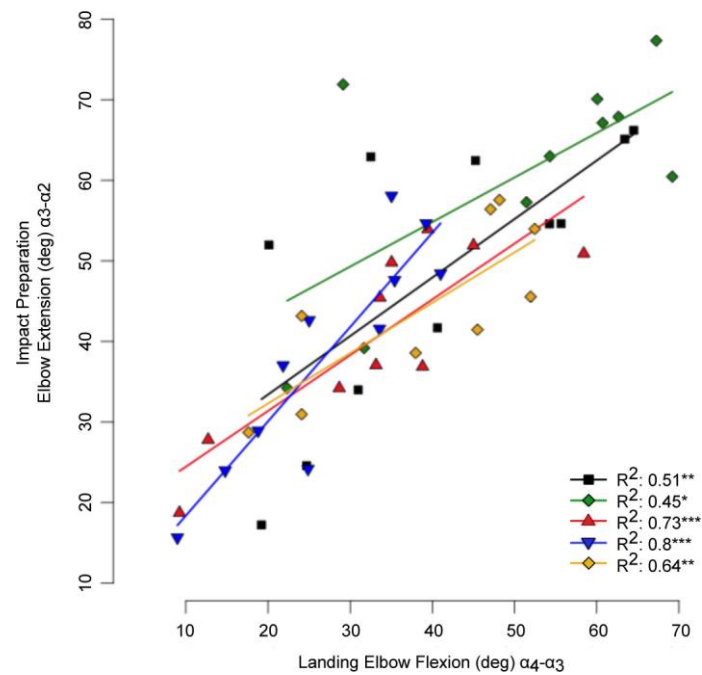

**Figure 5. Elbow and humeral configurations and excursions regressed against distance for each animal.** a) Elbow Extension/Flexion angle at Impact versus hop distance; b) Humeral Protraction/Retraction angle at impact versus hop distance; c) Elbow extension excursion during the impact preparation phase; d) Humeral protraction during the impact preparation phase. For all panels, different symbols and colors represent different animals and regression lines reflect significant relationships for individual toads.
